1 **Genetic diversity of *Anopheles coustani* in high malaria transmission foci in southern**  
2 **and central Africa**

3

4 Ilinca I. Ciubotariu<sup>1\*</sup>, Christine M. Jones<sup>2</sup>, Tamaki Kobayashi<sup>3</sup>, Thierry Bobanga<sup>4</sup>, Mbanga  
5 Muleba<sup>5</sup>, Julia C. Pringle<sup>2</sup>, Jennifer C. Stevenson<sup>2,6</sup>, Giovanna Carpi<sup>¶1</sup>, and Douglas E.  
6 Norris<sup>¶2</sup> for the Southern and Central Africa International Centers of Excellence for Malaria  
7 Research

8

9 <sup>1</sup>The Department of Biological Sciences, Purdue University, West Lafayette, Indiana, USA,  
10 <sup>2</sup>The W. Harry Feinstone Department of Molecular Microbiology and Immunology, The  
11 Johns Hopkins Malaria Research Institute, Johns Hopkins Bloomberg School of Public  
12 Health, Baltimore, Maryland, USA, <sup>3</sup>The Department of Epidemiology, Division of  
13 Infectious Disease Epidemiology, The Johns Hopkins Malaria Research Institute, Johns  
14 Hopkins Bloomberg School of Public Health, Baltimore, Maryland, USA, <sup>4</sup>The Department  
15 of Parasitology and Tropical Medicine, School of Medicine, University of Kinshasa,  
16 Kinshasa, Democratic Republic of Congo, <sup>5</sup>Tropical Diseases Research Centre, Ndola,  
17 Zambia, <sup>6</sup>Macha Research Trust, Choma, Zambia

18

19 \* Corresponding author, email: [iciubota@purdue.edu](mailto:iciubota@purdue.edu)

20 <sup>¶</sup>Equal contributors

21

22

23 **Abstract**

24

25 Despite ongoing malaria control efforts implemented throughout sub-Saharan Africa,  
26 malaria remains an enormous public health concern. Current interventions such as indoor  
27 residual spraying with insecticides and use of insecticide-treated bed nets are aimed at  
28 targeting the key malaria vectors that are primarily endophagic and endophilic. While these  
29 control measures have resulted in a substantial decline in malaria cases and continue to  
30 impact indoor transmission, the importance of alternative vectors for malaria transmission  
31 has been largely neglected. *Anopheles coustani*, an understudied vector of malaria, is a  
32 species previously thought to exhibit mostly zoophilic behavior. However, recent studies  
33 from across Africa bring to light the contribution of this and ecologically similar  
34 anopheline species to human malaria transmission. Like many of these understudied  
35 species, *An. coustani* has greater anthropophilic tendencies than previously appreciated, is  
36 often both endophagic and exophagic, and carries *Plasmodium falciparum* sporozoites.  
37 These recent developments highlight the need for more studies throughout the geographic  
38 range of this species and the potential need to control this vector. The aim of this study was  
39 to explore the genetic variation of *An. coustani* mosquitoes and the potential of this  
40 *Anopheles* species to contribute to malaria parasite transmission in high transmission  
41 settings in Nchelenge District, Zambia, and the Kashobwe and Kilwa Health Zones in  
42 Haut-Katanga Province, the Democratic Republic of the Congo (DRC). Morphologically  
43 identified *An. coustani* specimens that were trapped outdoors in these study sites were  
44 analyzed by PCR and sequencing for species identification and blood meal sources, and  
45 malaria parasite infection was determined by ELISA and qPCR. Fifty specimens were

46 confirmed to be *An. coustani* by the analysis of mitochondrial DNA cytochrome *c* oxidase  
47 subunit I (COI) and ribosomal internal transcribed spacer region 2 (ITS2). Further,  
48 maximum likelihood phylogenetic analysis of COI and ITS2 sequences revealed two  
49 distinct phylogenetic groups within this relatively small regional collection. Our findings  
50 indicate that both *An. coustani* groups have anthropophilic and exophagic habits and come  
51 into frequent contact with *P. falciparum*, suggesting that this potential alternative malaria  
52 vector might elude current vector controls in Northern Zambia and Southern DRC. This  
53 study sets the groundwork for more thorough investigations of bionomic characteristics and  
54 genetic diversity of *An. coustani* and its contribution to malaria transmission in these  
55 regions.

56

57 **Key words: malaria, *Anopheles coustani*, mosquito, transmission**

58

## 59 **Introduction**

60

61 Malaria is transmitted to humans by the infectious bite of female mosquitoes of the  
62 *Anopheles* genus, and approximately 70 *Anopheles* species are potential vectors of malaria  
63 that transmit the disease to humans effectively worldwide (Sinka et al. 2012). Species are  
64 often characterized as primary or secondary vectors: primary vectors are those mosquitoes  
65 that are abundant, most commonly feed on humans, and have measurable sporozoite rates,  
66 while secondary or alternative vectors can be uncommon, have low sporozoite rates, but  
67 may still play a role in malaria transmission (Oaks SC Jr. 1991).

68           Zambia, in sub-Saharan Africa, is a malaria-endemic country that has experienced  
69 high mortality and morbidity from this disease for decades (Mukonka et al. 2014, Ministry  
70 of Health Zambia 2015). Significant strides have been made to reduce malaria transmission,  
71 largely due to the implementation of vector control interventions (Bhatt et al. 2015). These  
72 interventions include vector control through the distribution of long-lasting insecticide-  
73 treated nets (LLINs), indoor residual spraying (IRS), treatment through intermittent  
74 preventive treatment in pregnancy (IPTp), and case management through the use of rapid  
75 diagnostic tests (RDTs) and artemisinin-combination therapy (ACT) (Chizema-Kawesha et  
76 al. 2010, Sutcliffe et al. 2012, MIS 2019, PMI 2019a). Despite successful reductions in  
77 morbidity and mortality, malaria remains endemic with over 6 million reported cases in  
78 2018 (MIS 2019, WHO 2019a). While the scaling-up of malaria interventions such as  
79 widespread coverage by LLINs and IRS reduced transmission and parasitemia throughout  
80 many parts of Zambia, the disease continues to be a significant public health concern,  
81 especially in the northern region where Nchelenge District, Luapula Province, is recognized  
82 as a high transmission focus (Chanda et al. 2013, Mukonka et al. 2014, Nambozi et al.  
83 2014, Hast et al. 2019). This region of Zambia reports over 350 confirmed cases per 1000  
84 population (Moss et al. 2012, PMI 2019a, WHO 2019a). This has raised doubts about  
85 whether the progress made across Zambia could be maintained and called for more  
86 enhanced and targeted interventions, especially in northern Zambia (Kamuliwo et al. 2013).

87           Like Zambia, the Democratic Republic of the Congo (DRC) is a malaria-endemic  
88 country in the central region of sub-Saharan Africa, located northeast of Zambia, and in  
89 which malaria is a leading cause of mortality and morbidity, accounting for approximately  
90 12% of malaria cases and 11% of deaths worldwide (Messina et al. 2011, Stone et al. 2015,

91 WHO 2019a). Despite actions taken to scale-up interventions in the DRC, such as the  
92 distribution of LLINs with over 50% household coverage throughout the country, malaria  
93 transmission still remains high and progress appeared to have stalled according to the world  
94 malaria health reports of 2017 and 2018 (Koukouikila-Koussounda and Ntoumi 2016,  
95 WHO 2019a). This country was part of the launch of the WHO and RBM Partnership to  
96 End Malaria in 2018 through a high burden to high impact country-led approach in the  
97 hopes of continuing progress and reaching the 2025 goals of the Global technical strategy  
98 for malaria (WHO 2015, 2019b). In 2018, the DRC was one of six countries that accounted  
99 for more than half of all malaria cases, globally, and had an estimated 26 million cases of  
100 malaria (WHO 2019a). Moreover, in this country, malaria remains the leading cause of  
101 morbidity and mortality, and accounts for 19% of deaths among children under the age of 5  
102 (Ferrari et al. 2016, PMI 2019b).

103 Zambia and the DRC exhibit seasonal transmission that follows rainfall patterns, in  
104 which malaria peaks after the rains when mosquito populations increase (Masaninga et al.  
105 2013). However, in Nchelenge District, malaria transmission is intense with limited  
106 seasonal fluctuations (Mharakurwa et al. 2012). In Nchelenge, the primary vectors of  
107 malaria in both the dry and wet seasons have been found to be *An. funestus* s.s. and  
108 *Anopheles gambiae* s.s. (Das et al. 2016, Jones et al. 2018, Hast et al. 2019). Malaria is also  
109 holoendemic in the DRC which borders Zambia to the north, but much less is known about  
110 malaria vectors and their phenology, other than that *An. funestus* s.s., *An. gambiae* s.s., and  
111 *An. coluzzii* are major vector species throughout the region, with the first two species  
112 exhibiting high biting rates (Bobanga et al. 2016, Nardini et al. 2017, Wat'senga et al.  
113 2018). Vector control methods such as IRS and LLINs, which have been implemented

114 throughout all of Zambia, and to a much less extent in the DRC, are aimed at targeting  
115 these vectors preferentially. In addition to a suboptimal coverage of vector control in  
116 northern Zambia and southern DRC, malaria may remain intractable due to the presence of  
117 alternative vector species that have largely remained unrecognized.

118         The focus on control and elimination methods for the well-recognized endophagic  
119 vector species highlights the fact that alternative vectors are rarely considered in existing  
120 malaria control programs, and are thought of as negligible because of their often zoophilic  
121 behavior (Fornadel et al. 2011). However, it has been observed that after primary vectors  
122 are reduced in a population, alternative vectors have the potential to sustain malaria  
123 transmission (Antonio-Nkondjio et al. 2006). Previous studies have indicated the presence  
124 of *P. falciparum* parasites in these alternative vectors in Kenya, Ethiopia, Zambia, and  
125 other regions in Africa (Stevenson et al. 2012, Degefa et al. 2015, Lobo et al. 2015,  
126 Nepomichene et al. 2015a, St. Laurent et al. 2016, Stevenson et al. 2016a). One of these  
127 alternative vectors, *An. coustani*, is a species previously reported to exhibit mostly  
128 zoophilic behavior (Gillies and DeMeillon 1968). However, recent studies from countries  
129 in southern Africa are bringing to light the potential contribution of this species to malaria  
130 transmission. In Zambia, this species displays an unexpectedly high degree of  
131 anthropophilic tendencies (Fornadel et al. 2011). In Kenya, this vector is both endophagic  
132 and exophagic and is thought to play a major role in outdoor malaria transmission  
133 (Mwangangi et al. 2013). In Madagascar, this vector has been shown to carry *P. falciparum*  
134 infections in both indoors and outdoors collections, and more recently, to act as a major  
135 local vector even though it is was previously a suspected alternative vector (Nepomichene  
136 et al. 2015b, Goupeyou-Youmsi et al. 2019). These findings emphasize that mosquito

137 species such as *An. coustani* may contribute more significantly to malaria transmission than  
138 previously recognized. These findings warrant further study of these alternative vectors,  
139 including foraging behaviors, ecology, genetics, and potential roles in the transmission of  
140 malaria.

141 As anophelines commonly exist as species complexes, integrating molecular and  
142 phylogenetic analysis to collections of *An. coustani* enable the confirmation of species  
143 identification, and allow for further assessment of genetic diversity and relatedness within  
144 and between species complexes. This study focused on assessing the potential role *An.*  
145 *coustani* may play in *P. falciparum* transmission in northern Zambia and southern DRC by  
146 analyzing phylogenetic relationships and human exposure. Improved species identification  
147 and correct association of species with phenotypes relevant to vectorial capacity will allow  
148 for the design of better control strategies.

149

## 150 **Methods**

151

### 152 **Mosquito collection and handling**

153 As part of the International Centers of Excellence for Malaria Research (ICEMR) in  
154 Southern and Central Africa, mosquito specimens were collected solely outdoors from  
155 Nchelenge District, northern Zambia, using standard Centers for Disease Control and  
156 Prevention (CDC) light traps, and from two villages (Kilwa and Kashobwe) in Haut-  
157 Katanga Province, southern DRC, using CDC light traps and pyrethrum spray catches  
158 (PSC) (Figure 1). In Nchelenge District, Zambia, CDC light traps were placed overnight in

159 the three following scenarios: outdoors where humans congregate, outdoors next to animal  
160 pens, and outdoors with a commercial human analogue bait (BG Lure<sup>®</sup>, BioGents).  
161 Households were selected using a similar sampling frame to that of other studies under the  
162 ICEMR program (Pinchoff et al. 2015, Stevenson et al. 2016b). Collections were performed  
163 over a 2-week period in August 2016 at eight households (4 inland along a stream and more  
164 than 3 km from Lake Mweru and 4 lakeside, close to Lake Mweru) for a total of 74 trap  
165 nights. Using a Latin Square design, trap scenarios were rotated through each household,  
166 such that each treatment occurred in each household at least once. Traps were activated at  
167 6pm and tied shut and retrieved the following morning.

168 In the DRC, the Kilwa Health Zone is located near Lake Mweru, across the lake  
169 from Nchelenge, Zambia, and the Kashobwe Health Zone is located near the Luapula River  
170 as it leaves the south end of Lake Mweru, providing abundant vector breeding sites  
171 throughout the year. In the Kilwa and Kashobwe Health Zones, 60 study households (Kilwa  
172 = 30 households, Kashobwe = 30 households) were randomly selected from village  
173 household census. Mosquito collections were performed by one of three collection  
174 scenarios: hanging CDC light traps indoors overnight next to a home occupant sleeping  
175 under a LLIN, hanging CDC light traps outdoors overnight by a window, or PSC early in  
176 the morning.

177 Anophelines collected in Nchelenge were killed by freezing, while those from the  
178 DRC were left at room temperature before being packaged. Anophelines were identified by  
179 sex and morphology with the aid of a dissecting microscope and dichotomous key at all  
180 field sites (Gillies and Coetzee 1987). Mosquitoes were then each placed individually in 0.6  
181 mL microcentrifuge tubes that contained silica gel desiccant and a cotton wool plug. They



182 were transported and stored at room temperature until processed in the laboratory at Johns  
183 Hopkins Bloomberg School of Public Health in Baltimore, Maryland.

184

### 185 **Isolation of DNA and Molecular Processing**

186 In the laboratory, the abdomen of each collected anopheline was separated from the  
187 head and thorax using sterile forceps, and then stored in separate tubes at -20°C. Genomic  
188 DNA was extracted from the frozen mosquito abdomens with a salt extraction method as  
189 previously described (Post et al. 1993, Norris et al. 2001, Das et al. 2016). A fragment of  
190 the mitochondrial cytochrome *c* oxidase subunit I (COI) gene used for the Barcode of Life  
191 Database (BOLD), a molecular target that has been previously used for phylogeny  
192 construction of anophelines, was amplified and sequenced from specimens that were  
193 morphologically identified as *An. coustani* for a total of 50 specimens (Beebe 2018). The  
194 698 bp BOLD fragment of the COI gene was amplified using LCO1490 and HCO2198  
195 primers as previously published (Lobo et al. 2015). The 25 µl PCR mixture consisted of 2.5  
196 µl of 10x buffer, 2.5 mM dNTP mixture, 30 pmol each of the forward and reverse primers,  
197 2.0 U of *Taq* DNA polymerase (Invitrogen, Carlsbad, CA), and 1 µl of mosquito DNA  
198 template. The thermocycler (MultiGene™ OptiMax Thermal Cycler, Labnet International,  
199 Inc., Edison, NJ) conditions were identical to the ones described by Lobo and colleagues  
200 (2015).

201 A 750 bp fragment of the ribosomal DNA internal transcribed spacer region 2  
202 (ITS2), a nuclear gene located between the 5.8S and 28S large subunit RNA genes that is  
203 often used for species verification and identification in anophelines, was also targeted for  
204 sequencing (Mohanty et al. 2009, Norris and Norris 2015). The ITS2 region was amplified

205 from genomic DNA using ITS2A and ITS2B primers, and the 25 µl PCR mixture was  
206 identical to that for the BOLD fragment amplification PCR (Lobo et al. 2015). The  
207 thermocycler conditions were identical to the ones described by Lobo and colleagues  
208 (2015).

209 The PCR-amplified products of all specimens were visualized by electrophoresis on  
210 a 2% agarose gel. Resulting PCR products were then purified using the QIAquick® PCR  
211 Purification Kit (Qiagen, Hilden, Germany) before Sanger sequencing by the Sequencing  
212 Facility at the Johns Hopkins School of Medicine. A multiplexed PCR was performed on  
213 DNA extracted from mosquito abdomens to detect multiple blood meals by a protocol that  
214 differentiates between possible mammalian host blood in female mosquitoes as animal-  
215 specific products (human, cow, dog, pig, goat) amplified from the cytochrome *b*  
216 mitochondrial gene as described in detail elsewhere (Kent and Norris 2005).

217

## 218 **Species assignment and Phylogenetic Analyses**

219 For both COI and ITS2 targets, forward and reverse sequences for each sample were  
220 trimmed to remove ends with low Phred quality and then high-quality trimmed forward and  
221 reverse sequences were aligned to generate a single consensus sequence for each individual  
222 sample using Geneious (Biomatters, Auckland, New Zealand) version 11.1.5  
223 (<https://www.geneious.com>). Each COI and ITS2 consensus sequences was then queried  
224 against the NCBI database using BLASTn for molecular species identification/assessment  
225 (Altschul et al. 1997). Samples were confirmed as a particular species when the COI  
226 BLAST results indicated that there was a minimum nucleotide identity of greater than 90%

227 and a significant E-value  $<1 \times 10^{-5}$ . Full consensus sequences for each sample were  
228 submitted to GenBank and assigned accession numbers (Supplementary Table 1).  
229 COI sequences that were confirmed as *An. coustani* after comparison with NCBI  
230 BLASTn were combined to generate a multiple sequence alignment using the MUSCLE  
231 algorithm and default parameters in the Geneious version 11.1.5 aligner. The multiple  
232 sequence alignment of 50 *An. coustani* sequences was then trimmed to a final length of 552  
233 bp for COI and 662 bp for ITS2. Furthermore, a multiple alignment was then created with  
234 the confirmed *An. coustani* samples and other *Anopheles* species from the Hyrcanus and  
235 Coustani groups from the NCBI database for the COI target, and with the confirmed *An.*  
236 *coustani* samples and other *An. coustani* ITS2 sequences for the ITS2 target, as this latter  
237 gene region is not highly conserved between species.

238 Phylogenetic analysis was conducted using maximum likelihood (ML) inference as  
239 implemented in MEGA X (Kumar et al. 2018, Stecher et al. 2020). The evolutionary  
240 history was inferred by the Maximum Likelihood method and General Time Reversible  
241 model (Nei and Kumar 2000). One tree with the highest log likelihood for each target was  
242 included in this manuscript. Branch support was included by bootstrap with 1000  
243 replications. The same steps were performed for analysis of the ITS2 sequences from the 50  
244 *An. coustani* mosquitoes.

245

#### 246 **Detection of *Plasmodium falciparum***

247 Head and thoraces of female *An. coustani* mosquitoes were homogenized in a  
248 phosphate-buffered saline based solution in 1.5 mL microcentrifuge tubes for enzyme-

249 linked immunosorbent assay (ELISA) and genomic DNA was extracted from half of the  
250 homogenate using the Qiagen: DNeasy Blood and Tissue Kit protocol (Qiagen, Hilden,  
251 Germany) (Beier 2002, Gomes et al. 2017). As quality control, genomic DNA  
252 concentration of each extract was quantified using High Sensitivity double-stranded DNA  
253 (dsDNA HS) assay on a Qubit 2.0 Fluorometer (Life Technologies, Grand Island, NY). All  
254 female *An. coustani* head and thoraces were subjected to the ELISA assay which uses  
255 monoclonal antibodies (CDC, Atlanta, USA) targeting the circumsporozoite protein (CSP)  
256 of *P. falciparum* sporozoites (Burkot et al. 1984). In addition, the genomic DNA extracts  
257 from the same individual mosquitoes were screened for *P. falciparum* DNA using a SYBR  
258 Green qPCR assay that targets an 85 bp fragment of the *P. falciparum* lactate  
259 dehydrogenase (*Pfldh*) gene using primers described elsewhere (Parr et al. 2016). The 25 µl  
260 PCR mixture consisted of 12.5 µl SYBR Green PCR Master Mix (Life Technologies,  
261 Warrington, United Kingdom), 1 µM each of the forward and reverse primers, and 4 µl of  
262 template DNA. Each reaction was performed in a StepOne Real-Time PCR System  
263 (Applied Biosystems, Foster City, CA) and the cycling conditions were the following: 50°C  
264 for 2 minutes, 95°C for 10 minutes, followed by 45 cycles of denaturation at 95°C for 15  
265 seconds, and annealing at 60°C for 1 minute. All samples were replicated in each reaction  
266 plate, no template controls (NTCs) were included and run alongside standard dilutions of  
267 gDNA of *P. falciparum* NF54 strain (1-10<sup>5</sup> *P. falciparum* genome equivalent/µl).

268

269 **Genetic Diversity**

270 DNAsp (version 5.10.1) was used to assess diversity and polymorphism statistics on  
271 the sequences obtained from the mosquito samples collected in Zambia and the DRC  
272 (Librado and Rozas 2009). The number of polymorphic sites (S), the number of haplotypes,  
273 average nucleotide diversity (nucleotide differences per site based on pairwise comparisons  
274 among DNA sequences) ( $\pi$ ), mean number of nucleotide differences (k), genetic diversity  
275 ( $\theta$ ), and haplotype diversity ( $H_d$ ) (probability that two samples randomly sampled are  
276 unique) were all calculated for both COI and ITS2 sequences (Nei 1987).

277

## 278 **Results**

279

280 A total of 42 female (31 from northern Zambia and 11 from southern DRC) and 15  
281 male (northern Zambia) morphological *An. coustani* were caught outdoors as part of this  
282 study, representing less than 5% of all mosquitoes captured from these study sites as part of  
283 a larger collection. Morphological identifications were conducted on all 57 of these  
284 specimens at the field sites, and all species included in this study were identified as *An.*  
285 *coustani*. Following extractions in the laboratory, both a 698 bp (BOLD) COI fragment and  
286 a 750 bp ITS2 fragment were amplified from the abdomen of all samples. 100% of the  
287 males successfully amplified with these PCRs, while 7 (16.7%) of the female mosquito  
288 amplifications failed after multiple attempts; thus, 50 samples were included in the  
289 remaining assays and analyses. Following Sanger sequencing and comparison to NCBI  
290 databases, all 50 of these mosquitoes that were morphologically identified as *An. coustani*  
291 were molecularly confirmed. All 50 *An. coustani* COI sequences matched (with at least

292 90% nucleotide identity and a significant E-value  $<1 \times 10^{-5}$ ) to previously reported *An.*  
293 *coustani* sequences deposited in NCBI (as of January 18, 2020). For the ITS2 fragment, 29  
294 (58%) of these samples did not yield any close matches (closest match of ~80% was  
295 *Anopheles yatsushiroensis*, a member of the Hyrcanus Group that is widely distributed in  
296 Oriental and Palaearctic areas) when their consensus sequences were blasted on the NCBI  
297 databases, which is presumably due to the relative lack of data for this locus and species in  
298 the database (Fang et al. 2017). There are over twenty *An. coustani* COI sequences publicly  
299 available (NCBI BLASTn, January 2020) and this gene is highly conserved, with little  
300 interspecies variation (Margoliash 1963). In contrast, there are currently only three  
301 previously submitted sequences in NCBI GenBank for the less conserved ITS2 gene for *An.*  
302 *coustani* (Coleman 2007).

303         Of the 35 female *An. coustani* samples, 4 (10.8%) had blood meals identified solely  
304 as goat, 3 (8.6%) had blood meals identified solely as human, and 3 (8.6%) had mixed  
305 blood meals identified as goat and human. None of the 35 female anopheline samples were  
306 CSP ELISA positive. All 35 female *An. coustani* samples were also analyzed by qPCR for  
307 *Pf**ldh*. Six samples (17.1%, 95% CI 6.5-33.6%) yielded positive signals for *P. falciparum*  
308 (parasite load was in the range of 1 parasite/ $\mu$ l – 5 parasite/ $\mu$ l), of which 2 were blooded  
309 with human blood.

310         The Maximum Likelihood analysis was performed for both the COI and ITS2  
311 fragments. The resulting phylogenetic tree that was constructed for the COI fragment  
312 (Figure 2) revealed that all specimens that were morphologically identified as *An. coustani*  
313 clustered together. The COI clustering revealed two well-supported molecular groups

314 (hereafter “*An. coustani* group A” and “*An. coustani* group B”) with 74% and 99%  
315 bootstrap support, respectively, among the *An. coustani* samples. *An. coustani* group A  
316 encompasses 21 samples from the field and previously described *An. coustani* sequences  
317 from Zambia (KR014841 and KR014843), Mali (MK585958), and the Republic of Guinea-  
318 Bissau (KM097027). Within group A, there is substructure that does not reflect geography,  
319 with samples from both Zambia and the DRC grouping closely with the aforementioned  
320 samples published from other parts of Africa. *An. coustani* group B, which has 100%  
321 bootstrap support, contains the remaining 29 newly reported sequences from this collection,  
322 and has two well-supported groups.

323 Similarly, the phylogenetic tree that was created for the ITS2 fragment (Figure 3)  
324 showed that all of the specimens morphologically identified as *An. coustani* clustered  
325 together. Moreover, the structuring revealed two groups (hereafter “*An. coustani* group A”  
326 and “*An. coustani* group B”) with 94% and 99% bootstrap support, respectively. *An.*  
327 *coustani* group A contained the same 21 sequences from field mosquitoes as *An. coustani*  
328 group A from the COI clustering, and the same was observed for the samples in the group  
329 B clusters for both genetic targets, providing a topological concordance between mtDNA  
330 COI and nuclear ITS2 phylogenetic trees. As observed for the COI target, previously  
331 published sequences of *An. coustani* clustered into *An. coustani* group A, even though they  
332 were from different geographical areas (KR014826 and KR014824 from Zambia,  
333 MK129245 from Madagascar, and KJ522815 from Kenya).

334 Genetic diversity parameters were calculated for each gene and *An. coustani* groups  
335 (Table 1). The mean haplotype diversity was higher for the *An. coustani* A groups of both  
336 targets ( $0.943 \pm 0.033$  for COI and  $0.762 \pm 0.050$  for ITS2) when compared to the *An.*

337 *coustani* B groups ( $0.860\pm 0.038$  for COI and  $0.655\pm 0.041$  for ITS2). Nucleotide diversity  
338 was also higher for the *An. coustani* A groups according to both genetic targets (0.011 for  
339 COI and 0.052 for ITS2) when compared to the *An. coustani* B groups (0.007 for COI and  
340 0.002 for ITS2) (Table 1). The low frequency of unique haplotypes in the *An. coustani* B  
341 groups is supported visually by both phylogenetic trees which generally show less  
342 clustering when compared to the A groups. Overall, haplotype and nucleotide diversity did  
343 not differ greatly between the two groups identified by the Maximum Likelihood  
344 phylogenies.

345

## 346 **Discussion**

347

348 All of the female *An. coustani* mosquitoes included in this study were caught  
349 outdoors, and some were found to be blooded either with human, goat, or a mixed blood  
350 meal of these two mammals. Although the sample size is small, these findings support  
351 reports that *An. coustani* is primarily exophagic (Nepomichene et al. 2015a, Degefa et al.  
352 2017). While none of the female *An. coustani* mosquitoes in this study had a positive signal  
353 from CSP ELISA assays, six samples were qPCR-positive for *P. falciparum*. The qPCR is a  
354 more sensitive assay than ELISA, but the pitfall of this approach is that although it can  
355 specifically detect *P. falciparum* DNA, it cannot determine if it was from infectious  
356 sporozoites, early developmental stages, or even intact parasites. In this study, head and  
357 thoraces of the mosquitoes were used, which should restrict the presence of other parasite  
358 stages such as oocysts, but the limitation in this study is that the presence of gametocytes



359 cannot be excluded (Carpi, unpublished). While this does not characterize the mosquitoes  
360 as infectious, finding human blood meals in 6 of 35 (3 solely human and 3 in combination  
361 with goat blood meal), and detection of *P. falciparum* DNA in 6 of 35 female *An. coustani*  
362 suggest that this mosquito feeds on human hosts frequently. Two of the samples that tested  
363 human-positive by PCR also tested qPCR-positive for *P. falciparum*.

364         Phylogenetic analyses of both COI and ITS2 fragments reveal that *An. coustani*  
365 from northern Zambia and southern DRC partition into two strongly supported groups,  
366 herein defined as *An. coustani* group A and *An. coustani* group B. These groups have 100%  
367 bootstrap support in the COI analysis and 99% bootstrap support in the ITS2 analysis  
368 (Figures 2 and 3). As “*An. coustani*” likely comprises an undescribed species complex in  
369 which genetic structuring would not be unexpected, the biological significance of this  
370 observed structure is currently unknown. Importantly, the tree topology for both genetic  
371 targets which incorporates identical sample sets, strengthens the observed clustering of  
372 these specimens. Moreover, female mosquitoes in both *An. coustani* groups A and B  
373 (according to both targets) had taken human blood meals. It is of particular interest that two  
374 of the samples from *An. coustani* group B were found to have fed on human blood and/or  
375 goat blood and were also found to be qPCR-positive for *P. falciparum*, illustrating the  
376 convergence of human host, parasite and vector, although no causality can be proven here.  
377 Moreover, the presence of the identical haplotypes for both genetic targets at low frequency  
378 from northern Zambia and southern DRC (Figures 2 and 3) may suggest that inter-breeding  
379 and migrations might be occurring between the *An. coustani* subpopulations. However,  
380 larger sample sizes and further genetic investigation are required to confirm this scenario.

381           Given that *An. coustani* has been linked to malaria transmission in other regions of  
382 Africa and that specimens within this limited sample set are associated both with biting  
383 humans and acquiring *P. falciparum*, further studies in Zambia and the DRC are warranted  
384 (St. Laurent et al. 2016, Stevenson et al. 2016a). More extensive investigations are  
385 necessary to truly understand the foraging behavior and malaria transmission potential of  
386 *An. coustani* and other understudied vectors. Such vectors are easily overlooked and may  
387 be behaviorally resistant to the indoor-based vector interventions deployed across sub-  
388 Saharan Africa (Afrane et al. 2016). Behavioral resistance that may result from genetic  
389 adaptations or phenotypic plasticity in primary and alternative vectors (Govella et al. 2013).  
390 For instance, in the Solomon Islands, the scale-up of ITNs and IRS has successfully  
391 eliminated the primary vector *An. koliensis* and has left *An. punctulatus* with a fragmented  
392 distribution, allowing an exophagic species (*An. farauti*) to emerge as the new sole primary  
393 vector as it changed its behavior to avoid insecticides (Bugoro et al. 2011, Russell et al.  
394 2013). These findings highlight the urgency to expand entomological surveillance to  
395 include other anopheline species, especially in transmission settings where primary  
396 endophagic and endophilic vector populations have been mostly successfully controlled by  
397 elimination strategies, but transmission still remains. In these regions, residual transmission  
398 will be maintained by mosquito populations that preferentially bite outdoors and are clear  
399 of indoor-based control measures. In these sub-Saharan settings, exophagic species such as  
400 *An. coustani* are ready to play a more significant role in transmission.

401

402

403 **Acknowledgements**

404 The authors kindly acknowledge the Southern and Central Africa ICEMR field teams in  
405 Nchelenge District in Zambia and Kashobwe and Kilwa Health Zones in the DRC for their  
406 logistical assistance and participation in field collections. The authors are very grateful to  
407 the communities in Zambia and the DRC from which household collections were drawn  
408 and the National Malaria Control/Elimination Programs under the Ministries of Health in  
409 both DRC and Zambia.

410

411 **Financial Support**

412 This work was supported in part by funding from the National Institutes of Health  
413 International Centers of Excellence for Malaria Research (U19AI089680), Bloomberg  
414 Philanthropies and the Johns Hopkins Malaria Institute, and T32 grant support  
415 (T32AI0074717) to CMJ.

416

417 **Competing Interests**

418 The authors affirm that there are no competing interests to be declared.

419

420 **Author contributions**

421 DEN and IIC conceived and developed the study. JCS, MM, GC, CMJ, and TK carried out  
422 field collections and compiled collection data. Samples were processed by IIC, CMJ, and  
423 TK and phylogenetic trees constructed and analyzed by IIC, GC, DEN and CMJ. IIC and  
424 DEN drafted the manuscript. All authors read and reviewed the final manuscript.

425 **Tables and Figures**

426

427 **Table 1. Genetic diversity by genetic target and phylogenetic *An. coustani* group**

|                                                 | COI                            |                                | ITS2                           |                                |
|-------------------------------------------------|--------------------------------|--------------------------------|--------------------------------|--------------------------------|
|                                                 | <i>An. coustani</i><br>group A | <i>An. coustani</i><br>group B | <i>An. coustani</i><br>group A | <i>An. coustani</i><br>group B |
| no. sequences                                   | 21                             | 29                             | 21                             | 29                             |
| S (no. polymorphic sites)                       | 23                             | 22                             | 58                             | 11                             |
| h (no. haplotypes)                              | 14                             | 17                             | 7                              | 7                              |
| H <sub>d</sub> (haplotype diversity) ± Std. dev | 0.943±0.033                    | 0.860±0.038                    | 0.762±0.050                    | 0.655±0.041                    |
| π (nucleotide diversity)                        | 0.011                          | 0.007                          | 0.052                          | 0.002                          |
| k (average no. nucleotide differences)          | 6.200                          | 3.774                          | 28.859                         | 1.333                          |
| θ (per site from Eta)                           | 0.012                          | 0.009                          | 0.024                          | 0.004                          |

428

429 DNASp (v. 5.10.1) was used to calculate the number of polymorphic sites (S), the number

430 of DNA haplotypes (h), the haplotype diversity (H<sub>d</sub>), the nucleotide diversity (π) among all

431 loci, the average number of nucleotide differences (k), and theta per site from Eta.

432

433

434

435

436

437

438

439

440

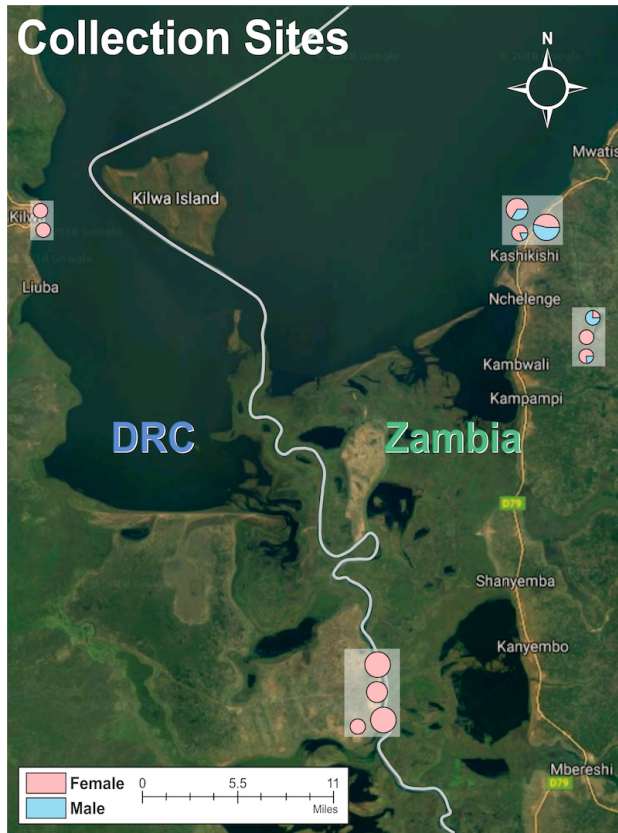

441

442 **Figure 1.** Distribution of caught mosquitoes over multiple sites in Zambia and the DRC.

443 The size of the circle refers to the proportion of samples caught in a specific area relative to

444 the size of the collection, and the color represents the ratio of males/females in a specific

445 area.

446

447

448

449

450

451

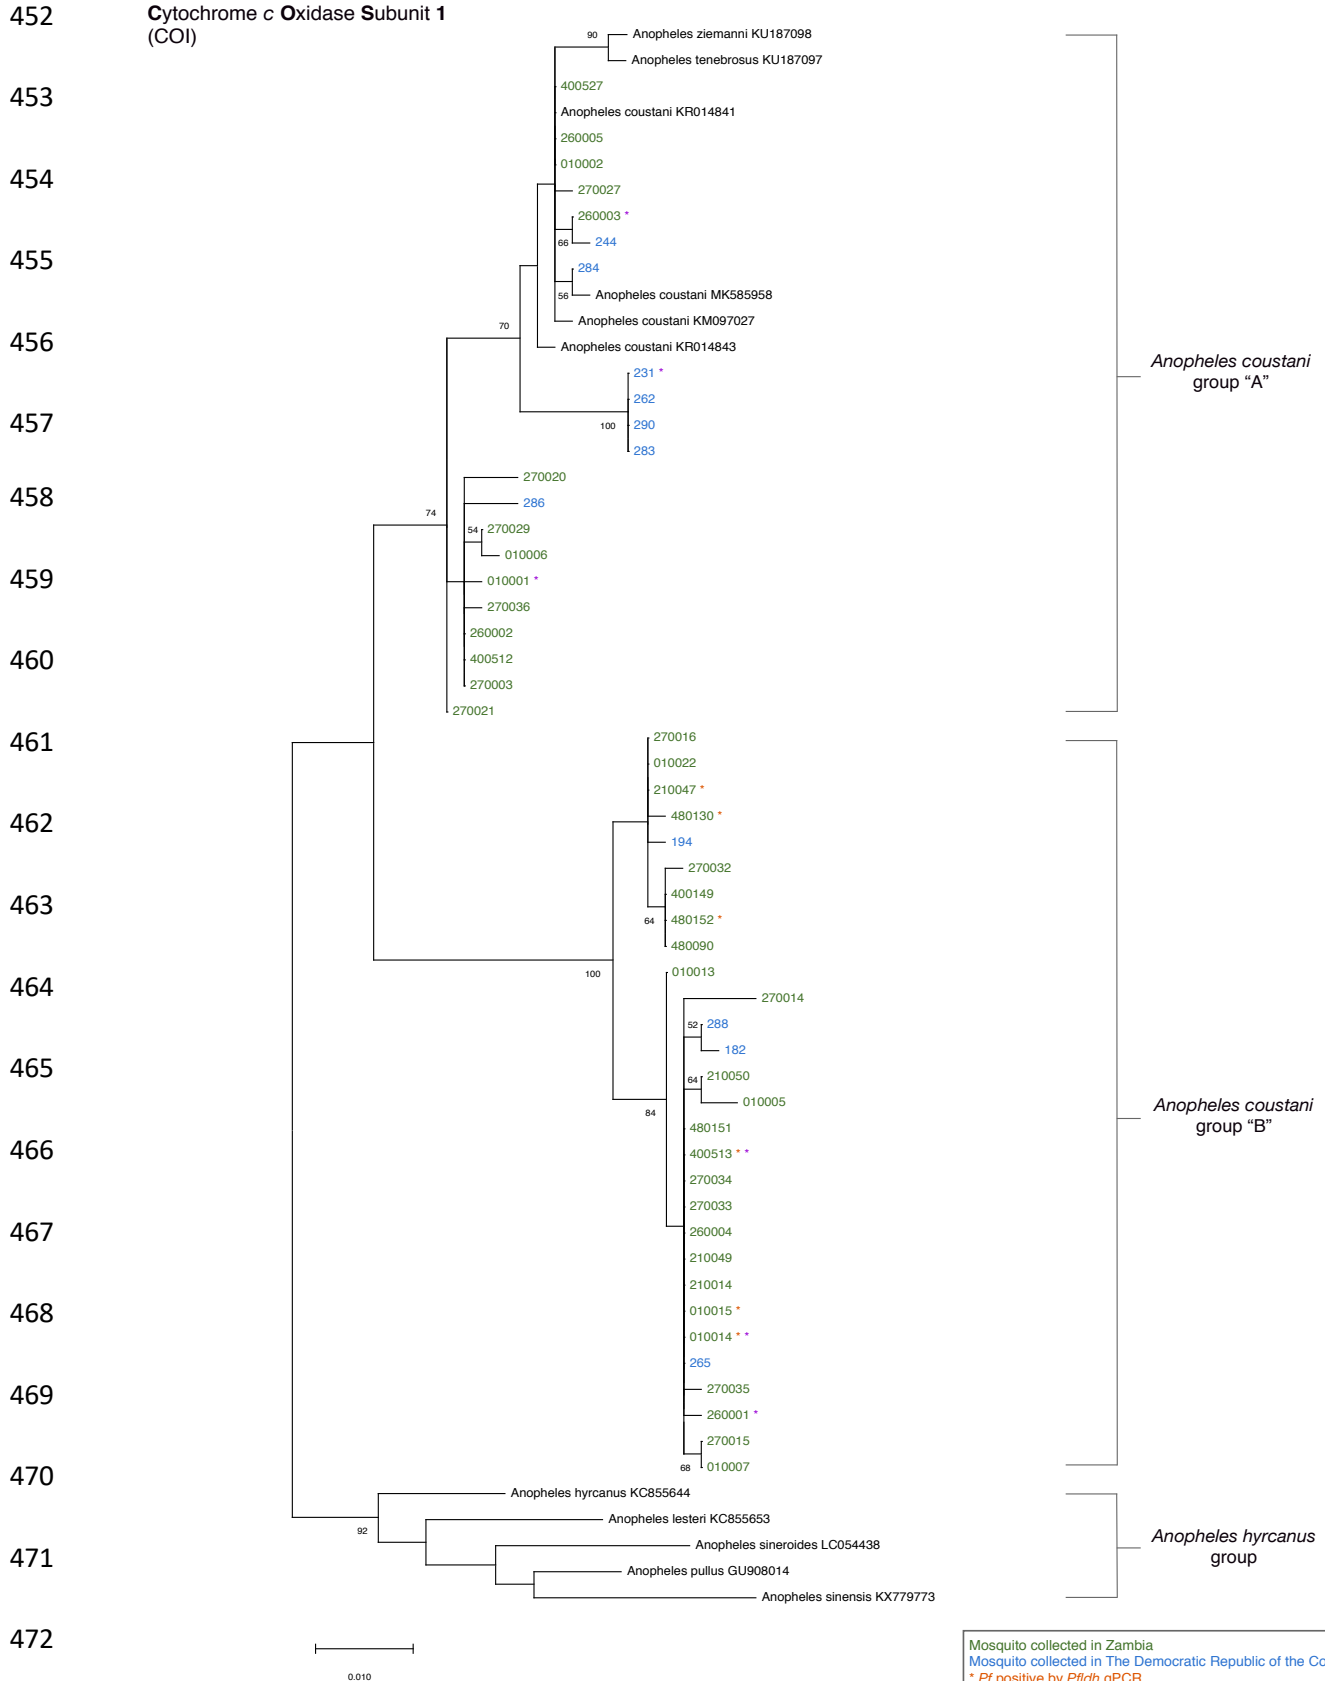

473 **Figure 2.** Cytochrome *c* oxidase subunit I (COI) Maximum Likelihood tree.

474 This evolutionary analysis was performed using the Maximum Likelihood method and  
475 General Time Reversible model, with 1000 bootstraps for branch support (Nei and Kumar  
476 2000). The tree with the highest log likelihood (-1603.26) is shown. The tree is drawn to  
477 scale, with branch lengths shown in the number of substitutions per site. This analysis  
478 contains 61 samples, including 50 samples from this collection, and 11 sample sequences  
479 obtained from NCBI BLASTn. Evolutionary analyses were conducted in MEGA X (Kumar  
480 et al. 2018, Stecher et al. 2020).

481

482

483

484

485

486

487

488

489

490

491

492

493

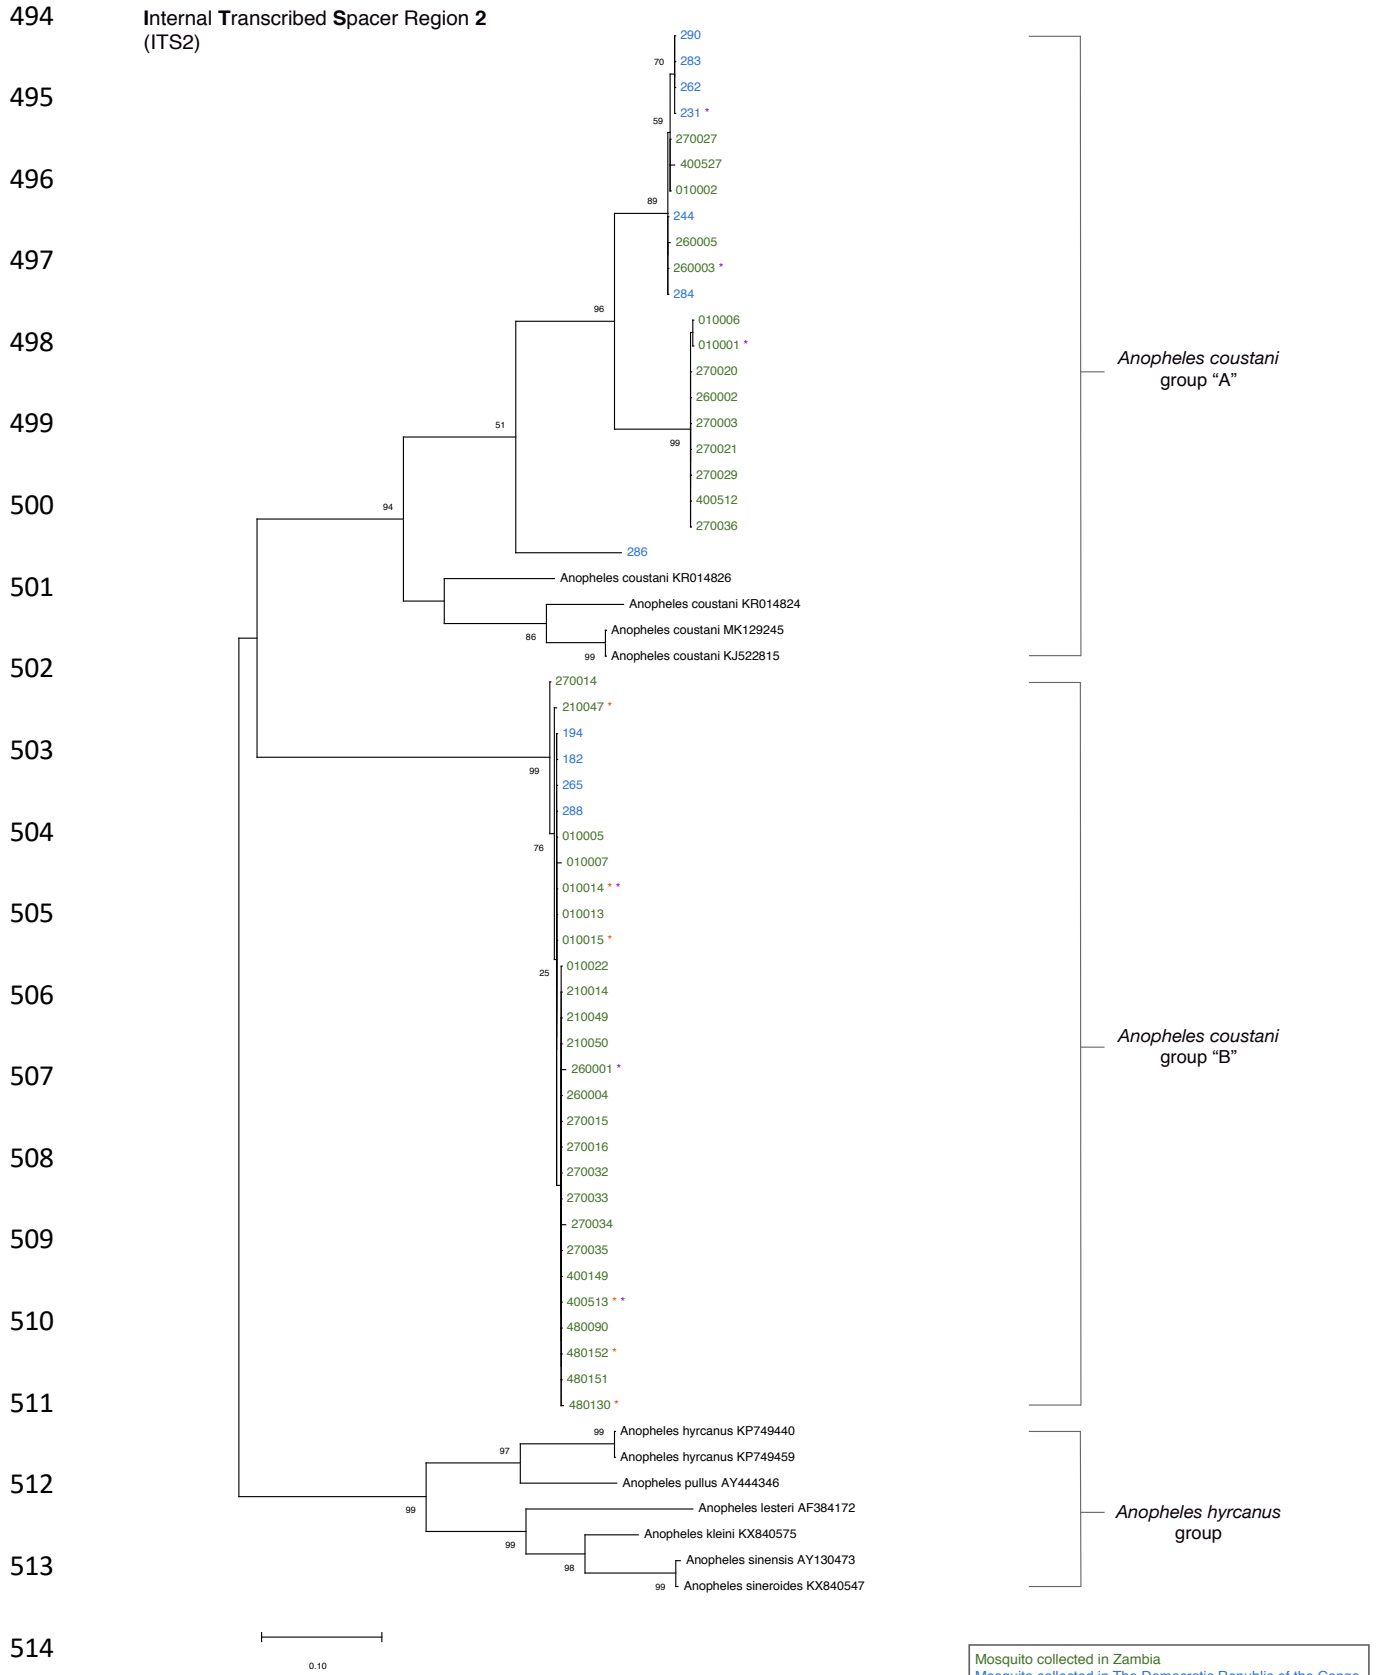



515 **Figure 3.** Ribosomal internal transcribed spacer region 2 (ITS2) Maximum Likelihood tree.

516 This evolutionary analysis was performed using the Maximum Likelihood method and  
517 General Time Reversible model, with 1000 bootstraps for branch support (Nei and Kumar  
518 2000). The tree with the highest log likelihood (-4723.20) is shown. The tree is drawn to  
519 scale, with branch lengths shown in the number of substitutions per site. This analysis  
520 contains 61 samples, including 50 samples from this collection, and 11 sample sequences  
521 obtained from NCBI BLASTn. Evolutionary analyses were conducted in MEGA X (Kumar  
522 et al. 2018, Stecher et al. 2020).

523

524

525

526

527

528

529

530

531

532

533

534

535

536 **References**

537

538 **Afrane, Y. A., M. Bonizzoni, and G. Yan. 2016.** Secondary Malaria Vectors of Sub-  
539 Saharan Africa: Threat to Malaria Elimination on the Continent? In A. J. Rodriguez-  
540 Morales (ed.), *Current Topics in Malaria*. IntechOpen.

541 **Altschul, S. F., T. L. Madden, A. A. Schäffer, J. Zhang, Z. Zhang, W. Miller, and D. J.**  
542 **Lipman. 1997.** Gapped BLAST and PSI-BLAST: a new generation of protein  
543 database search programs. *Nucleic Acids Res* 25: 3389-3402.

544 **Antonio-Nkondjio, C., Kerah CH, Simard F, Awono-Ambene P, Chouaibou M,**  
545 **Tchuinkam T, and F. D. 2006.** Complexity of the malaria vectorial system in  
546 Cameroon: contribution of secondary vectors to malaria transmission. *Journal of*  
547 *Medical Entomology* 43: 1215-1221.

548 **Beebe, N. W. 2018.** DNA barcoding mosquitoes: advice for potential prospectors.  
549 *Parasitology* 145: 622-633.

550 **Beier, J. 2002.** Vector incrimination and entomological inoculation rates, pp. 3-11. In D.  
551 D.L. (ed.), *Malaria methods and protocols*, vol. 72. Humana Press, *Methods in*  
552 *molecular medicine*.

553 **Bhatt, S., D. J. Weiss, E. Cameron, D. Bisanzio, B. Mappin, U. Dalrymple, K. E.**  
554 **Battle, C. L. Moyes, A. Henry, P. A. Eckhoff, E. A. Wenger, O. Briët, M. A.**  
555 **Penny, T. A. Smith, A. Bennett, J. Yukich, T. P. Eisele, J. T. Griffin, C. A.**  
556 **Fergus, M. Lynch, F. Lindgren, J. M. Cohen, C. L. J. Murray, D. L. Smith, S.**  
557 **I. Hay, R. E. Cibulskis, and P. W. Gething. 2015.** The effect of malaria control on  
558 *Plasmodium falciparum* in Africa between 2000 and 2015. *Nature* 526: 207-211.

- 559 **Bobanga, T., S. E. Umesumbu, A. S. Mandoko, C. N. Nsibu, E. B. Dotson, R. F. Beach,**  
560 **and S. R. Irish. 2016.** Presence of species within the *Anopheles gambiae* complex  
561 in the Democratic Republic of Congo. *Transactions of The Royal Society of*  
562 *Tropical Medicine and Hygiene* 110: 373-375.
- 563 **Bugoro, H., C. Iro'ofa, D. O. Mackenzie, A. Apairamo, W. Hevalao, S. Corcoran, A.**  
564 **Bobogare, N. W. Beebe, T. L. Russell, C.-C. Chen, and R. D. Cooper. 2011.**  
565 Changes in vector species composition and current vector biology and behaviour  
566 will favour malaria elimination in Santa Isabel Province, Solomon Islands. *Malaria*  
567 *Journal* 10: 287.
- 568 **Burkot, T. R., J. L. Williams, and I. Schneider. 1984.** Identification of *Plasmodium*  
569 *Falciparum*-Infected Mosquitoes by a Double Antibody Enzyme-Linked  
570 Immunosorbent Assay\*. *The American Journal of Tropical Medicine and Hygiene*  
571 33: 783-788.
- 572 **Chanda, E., M. Kamuliwo, R. W. Steketee, M. B. Macdonald, O. Babaniyi, and V. M.**  
573 **Mukonka. 2013.** An Overview of the Malaria Control Programme in Zambia.  
574 *ISRN Preventive Medicine* 2013: 8.
- 575 **Chizema-Kawesha, E., J. M. Miller, R. W. Steketee, V. M. Mukonka, C. Mukuka, A.**  
576 **D. Mohamed, S. K. Miti, and C. C. Campbell. 2010.** Scaling up malaria control in  
577 Zambia: progress and impact 2005-2008. *The American journal of tropical*  
578 *medicine and hygiene* 83: 480-488.
- 579 **Coleman, A. W. 2007.** Pan-eukaryote ITS2 homologies revealed by RNA secondary  
580 structure. *Nucleic Acids Res* 35: 3322-3329.

- 581 **Das, S., M. Muleba, J. C. Stevenson, D. E. Norris, and T. for the Southern Africa**  
582 **International Centers of Excellence for Malaria Research. 2016.** Habitat  
583 Partitioning of Malaria Vectors in Nchelenge District, Zambia. *The American*  
584 *Journal of Tropical Medicine and Hygiene* 94: 1234-1244.
- 585 **Degefa, T., D. Yewhalaw, G. Zhou, M.-C. Lee, H. Atieli, A. K. Githeko, and G. Yan.**  
586 **2017.** Indoor and outdoor malaria vector surveillance in western Kenya:  
587 implications for better understanding of residual transmission. *Malaria journal* 16:  
588 443-443.
- 589 **Degefa, T., A. Zeynudin, A. Godesso, Y. H. Michael, K. Eba, E. Zemene, D. Emanu, B.**  
590 **Birlie, K. Tushune, and D. Yewhalaw. 2015.** Malaria incidence and assessment of  
591 entomological indices among resettled communities in Ethiopia: a longitudinal  
592 study. *Malaria Journal* 14: 24.
- 593 **Fang, Y., W.-Q. Shi, and Y. Zhang. 2017.** Molecular phylogeny of *Anopheles hyrcanus*  
594 group members based on ITS2 rDNA. *Parasites & Vectors* 10: 417.
- 595 **Ferrari, G., H. M. Ntuku, S. Schmidlin, E. Diboulo, A. K. Tshetu, and C. Lengeler.**  
596 **2016.** A malaria risk map of Kinshasa, Democratic Republic of Congo. *Malaria*  
597 *journal* 15: 27-27.
- 598 **Fornadel, C. M., L. C. Norris, V. Franco, and D. E. Norris. 2011.** Unexpected  
599 Anthropophily in the Potential Secondary Malaria Vectors *Anopheles coustani* s.l.  
600 and *Anopheles squamosus* in Macha, Zambia. *Vector Borne and Zoonotic Diseases*  
601 11: 1173-1179.

- 602 **Gillies, M. T., and B. DeMeillon. 1968.** The Anophelinae of Africa south of the Sahara  
603 (Ethiopian Zoogeographical Region). Publications of the South African Institute for  
604 Medical Research 54.
- 605 **Gillies, M. T., and M. Coetzee. 1987.** A Supplement to the Anophelinae of Africa South  
606 of the Sahara. Johannesburg: South African Institute for Medical Research.
- 607 **Gomes, F. M., B. L. Hixson, M. D. W. Tyner, J. L. Ramirez, G. E. Canepa, T. L. Alves**  
608 **e Silva, A. Molina-Cruz, M. Keita, F. Kane, B. Traoré, N. Sogoba, and C.**  
609 **Barillas-Mury. 2017.** Effect of naturally occurring Wolbachia in Anopheles  
610 gambiae s.l. mosquitoes from Mali on Plasmodium falciparum malaria  
611 transmission. Proceedings of the National Academy of Sciences 114: 12566-12571.
- 612 **Goupeyou-Youmsi, J., T. Rakotondranaivo, N. Puchot, I. Peterson, R. Girod, I. Vigan-**  
613 **Womas, M. O. Ndiath, and C. Bourgoquin. 2019.** Differential contribution of  
614 Anopheles coustani and Anopheles arabiensis to the transmission of Plasmodium  
615 falciparum and Plasmodium vivax in two neighboring villages of Madagascar.  
616 bioRxiv: 787432.
- 617 **Govella, N. J., P. P. Chaki, and G. F. Killeen. 2013.** Entomological surveillance of  
618 behavioural resilience and resistance in residual malaria vector populations. Malaria  
619 Journal 12: 124.
- 620 **Hast, M. A., J. C. Stevenson, M. Muleba, M. Chaponda, J.-B. Kabuya, M. Mulenga, J.**  
621 **Lessler, T. Shields, W. J. Moss, D. E. Norris, f. t. Southern, and C. A. I. C. o. E.**  
622 **i. M. Research. 2019.** Risk Factors for Household Vector Abundance Using Indoor  
623 CDC Light Traps in a High Malaria Transmission Area of Northern Zambia. The  
624 American Journal of Tropical Medicine and Hygiene 101: 126-136.

- 625 **Jones, C. M., Y. Lee, A. Kitchen, T. Collier, J. C. Pringle, M. Muleba, S. Irish, J. C.**  
626 **Stevenson, M. Coetzee, A. J. Cornel, D. E. Norris, and G. Carpi. 2018.**  
627 Complete *Anopheles funestus* mitogenomes reveal an ancient history of  
628 mitochondrial lineages and their distribution in southern and central Africa.  
629 Scientific Reports 8: 9054.
- 630 **Kamuliwo, M., E. Chanda, U. Haque, M. Mwanza-Ingwe, C. Sikaala, C. Katebe-**  
631 **Sakala, V. M. Mukonka, D. E. Norris, D. L. Smith, G. E. Glass, and W. J.**  
632 **Moss. 2013.** The changing burden of malaria and association with vector control  
633 interventions in Zambia using district-level surveillance data, 2006–2011. *Malaria*  
634 *Journal* 12: 437.
- 635 **Kent, R. J., and D. E. Norris. 2005.** Identification of mammalian blood meals in  
636 mosquitoes by a multiplexed polymerase chain reaction targeting cytochrome B.  
637 *The American journal of tropical medicine and hygiene* 73: 336-342.
- 638 **Koukouikila-Koussounda, F., and F. Ntoumi. 2016.** Malaria epidemiological research in  
639 the Republic of Congo. *Malaria Journal* 15: 598.
- 640 **Kumar, S., G. Stecher, M. Li, K. Christina, and K. Tamura. 2018.** MEGA X:  
641 Molecular Evolutionary Genetics Analysis across computing platforms. *Molecular*  
642 *Biology and Evolution* 35: 1547-1549.
- 643 **Librado, P., and J. Rozas. 2009.** DnaSP v5: a software for comprehensive analysis of  
644 DNA polymorphism data. *Bioinformatics* 25: 1451-1452.
- 645 **Lobo, N. F., B. S. Laurent, C. H. Sikaala, B. Hamainza, J. Chanda, D. Chinula, S. M.**  
646 **Krishnankutty, J. D. Mueller, N. A. Deason, Q. T. Hoang, H. L. Boldt, J.**  
647 **Thumloup, J. Stevenson, A. Seyoum, and F. H. Collins. 2015.** Unexpected

- 648 diversity of Anopheles species in Eastern Zambia: implications for evaluating  
649 vector behavior and interventions using molecular tools. Scientific Reports 5:  
650 17952.
- 651 **Margoliash, E. 1963.** Primary Structure and Evolution of Cytochrome C. Proc Natl Acad  
652 Sci U S A 50: 672-679.
- 653 **Masaninga, F., E. Chanda, P. Chanda-Kapata, B. Hamainza, H. T. Masendu, M.  
654 Kamuliwo, W. Kapelwa, J. Chimumbwa, J. Govere, M. Otten, I. S. Fall, and O.  
655 Babaniyi. 2013.** Review of the malaria epidemiology and trends in Zambia. Asian  
656 Pacific journal of tropical biomedicine 3: 89-94.
- 657 **Messina, J. P., S. M. Taylor, S. R. Meshnick, A. M. Linke, A. K. Tshefu, B. Atua, K.  
658 Mwandagalirwa, and M. Emch. 2011.** Population, behavioural and environmental  
659 drivers of malaria prevalence in the Democratic Republic of Congo. Malaria Journal  
660 10: 161-161.
- 661 **Mharakurwa, S., P. E. Thuma, D. E. Norris, M. Mulenga, V. Chalwe, J. Chipeta, S.  
662 Munyati, S. Mutambu, P. R. Mason, and I. T. Southern Africa. 2012.** Malaria  
663 epidemiology and control in Southern Africa. Acta tropica 121: 202-206.
- 664 **Ministry of Health Zambia, M. 2015.** Zambia National Malaria Indicator Survey. Lusaka,  
665 Zambia: Ministry of Health., [http://www.makingmalariahistory.org/wp-](http://www.makingmalariahistory.org/wp-content/uploads/2017/06/Zambia-MIS2015_Jan20-nosigs.pdf)  
666 [content/uploads/2017/06/Zambia-MIS2015\\_Jan20-nosigs.pdf](http://www.makingmalariahistory.org/wp-content/uploads/2017/06/Zambia-MIS2015_Jan20-nosigs.pdf).
- 667 **MIS. 2019.** Zambia National Malaria Indicator Survey PATH; National Malaria  
668 Elimination Centre.
- 669 **Mohanty, A., S. Swain, S. K. Kar, and R. K. Hazra. 2009.** Analysis of the phylogenetic  
670 relationship of Anopheles species, subgenus Cellia (Diptera: Culicidae) and using it

671 to define the relationship of morphologically similar species. *Infection, Genetics*  
672 *and Evolution* 9: 1204-1224.

673 **Moss, W. J., D. E. Norris, S. Mharakurwa, A. Scott, M. Mulenga, P. R. Mason, J.**  
674 **Chipeta, and P. E. Thuma. 2012.** Challenges and Prospects for Malaria  
675 Elimination in the Southern Africa Region. *Acta Tropica* 121: 207-211.

676 **Mukonka, V. M., E. Chanda, U. Haque, M. Kamuliwo, G. Mushingi, J. Chileshe, K.**  
677 **A. Chibwe, D. E. Norris, M. Mulenga, M. Chaponda, M. Muleba, G. E. Glass,**  
678 **and W. J. Moss. 2014.** High burden of malaria following scale-up of control  
679 interventions in Nchelenge District, Luapula Province, Zambia. *Malaria Journal* 13:  
680 153.

681 **Mwangangi, J. M., E. J. Muturi, S. M. Muriu, J. Nzovu, J. T. Midega, and C. Mbogo.**  
682 **2013.** The role of *Anopheles arabiensis* and *Anopheles coustani* in indoor and  
683 outdoor malaria transmission in Taveta District, Kenya. *Parasites & Vectors* 6: 114-  
684 114.

685 **Nambozi, M., P. Malunga, M. Mulenga, J.-P. Van Geertruyden, and U. D'Alessandro.**  
686 **2014.** Defining the malaria burden in Nchelenge District, northern Zambia using the  
687 World Health Organization malaria indicators survey. *Malaria journal* 13: 220-220.

688 **Nardini, L., R. H. Hunt, Y. L. Dahan-Moss, N. Christie, R. N. Christian, M. Coetzee,**  
689 **and L. L. Koekemoer. 2017.** Malaria vectors in the Democratic Republic of the  
690 Congo: the mechanisms that confer insecticide resistance in *Anopheles gambiae* and  
691 *Anopheles funestus*. *Malaria Journal* 16: 448.

692 **Nei, M. 1987.** *Molecular evolutionary genetics*, pp. 512. New York: Columbia University  
693 Press.



- 694 **Nei, M., and S. Kumar. 2000.** Molecular Evolution and Phylogenetics, Oxford University  
695 Press, New York.
- 696 **Nepomichene, T. N. J. J., E. Tata, and S. Boyer. 2015a.** Malaria case in Madagascar,  
697 probable implication of a new vector, *Anopheles coustani*. *Malaria journal* 14: 475-  
698 475.
- 699 **Nepomichene, T. N. J. J., E. Tata, and S. Boyer. 2015b.** Malaria case in Madagascar,  
700 probable implication of a new vector, *Anopheles coustani*. *Malaria Journal* 14: 475.
- 701 **Norris, D. E., A. Shurtleff, Y. T. Touré, and G. C. Lanzaro. 2001.** Microsatellite DNA  
702 polymorphism and heterozygosity among field and laboratory populations of  
703 *Anopheles gambiae* ss (Diptera: Culicidae). *Journal of Medical Entomology* 38(2):  
704 336-340.
- 705 **Norris, L. C., and D. E. Norris. 2015.** Phylogeny of anopheline (Diptera: Culicidae)  
706 species in southern Africa, based on nuclear and mitochondrial genes. *Journal of*  
707 *vector ecology : journal of the Society for Vector Ecology* 40: 16-27.
- 708 **Oaks SC Jr., M. V., Pearson GW, et al., editors. 1991.** Vector Biology, Ecology, and  
709 Control. In *I. o. M. U. C. f. t. S. o. M. P. a. Control* (ed.), "Malaria: Obstacles and  
710 Opportunities", vol. 7. National Academies Press (US).
- 711 **Parr, J. B., C. Belson, J. C. Patel, I. F. Hoffman, P. Kamthunzi, F. Martinson, G.**  
712 **Tegha, I. Thengolose, C. Drakeley, S. R. Meshnick, V. Escamillia, M. Emch,**  
713 **and J. J. Juliano. 2016.** Estimation of *Plasmodium falciparum* Transmission  
714 Intensity in Lilongwe, Malawi, by Microscopy, Rapid Diagnostic Testing, and  
715 Nucleic Acid Detection. *The American Journal of Tropical Medicine and Hygiene*  
716 95: 373-377.

- 717 **Pinchoff, J., H. Hamapumbu, T. Kobayashi, L. Simubali, J. C. Stevenson, D. E.**  
718 **Norris, E. Colantuoni, P. E. Thuma, and J. M. f. t. S. A. I. C. o. E. f. M. R.**  
719 **William. 2015.** Factors Associated with Sustained Use of Long-Lasting Insecticide-  
720 Treated Nets Following a Reduction in Malaria Transmission in Southern Zambia.  
721 *The American Journal of Tropical Medicine and Hygiene* 93: 954-960.
- 722 **PMI. 2019a.** Zambia Malaria Operational Plan FY 2019. USAID: U.S. President's Malaria  
723 Initiative.
- 724 **PMI. 2019b.** FY 2019 Democratic Republic of Congo Abbreviated Malaria Operational  
725 Plan. USAID: U.S. President's Malaria Initiative.
- 726 **Post, R. J., P. K. Flook, and A. L. Millest. 1993.** Methods for the preservation of insects  
727 for DNA studies. *Biochemical Systematics and Ecology* 21: 85-92.
- 728 **Russell, T. L., N. W. Beebe, R. D. Cooper, N. F. Lobo, and T. R. Burkot. 2013.**  
729 Successful malaria elimination strategies require interventions that target changing  
730 vector behaviours. *Malaria Journal* 12: 56.
- 731 **Sinka, M. E., M. J. Bangs, S. Manguin, Y. Rubio-Palis, T. Chareonviriyaphap, M.**  
732 **Coetzee, C. M. Mbogo, J. Hemingway, A. P. Patil, W. H. Temperley, P. W.**  
733 **Gething, C. W. Kabaria, T. R. Burkot, R. E. Harbach, and S. I. Hay. 2012.** A  
734 global map of dominant malaria vectors. *Parasites & vectors* 5: 69-69.
- 735 **St. Laurent, B., M. Cooke, S. M. Krishnankutty, P. Asih, J. D. Mueller, S. Kahindi, E.**  
736 **Ayoma, R. M. Oriango, J. Thumloup, C. Drakeley, J. Cox, F. H. Collins, N. F.**  
737 **Lobo, and J. C. Stevenson. 2016.** Molecular Characterization Reveals Diverse and  
738 Unknown Malaria Vectors in the Western Kenyan Highlands. *The American*  
739 *Journal of Tropical Medicine and Hygiene* 94: 327-335.

- 740 **Stecher, G., K. Tamura, and S. Kumar. 2020.** Molecular Evolutionary Genetics Analysis  
741 (MEGA) for macOS. *Molecular Biology and Evolution*.
- 742 **Stevenson, J., B. St. Laurent, N. F. Lobo, M. K. Cooke, S. C. Kahindi, R. M. Oriango,**  
743 **R. E. Harbach, J. Cox, and C. Drakeley. 2012.** Novel Vectors of Malaria Parasite  
744 in the Western Highlands of Kenya. *Emerging Infectious Diseases* 18: 1547-1549.
- 745 **Stevenson, J. C., L. Simubali, S. Mbambara, M. Musonda, S. Mweetwa, T. Mudenda,**  
746 **J. C. Pringle, C. M. Jones, and D. E. Norris. 2016a.** Detection of *Plasmodium*  
747 *falciparum* Infection in *Anopheles squamosus* (Diptera: Culicidae) in an Area  
748 Targeted for Malaria Elimination, Southern Zambia. *Journal of Medical*  
749 *Entomology* 53: 1482-1487.
- 750 **Stevenson, J. C., J. Pinchoff, M. Muleba, J. Lupiya, H. Chilusu, I. Mwelwa, D.**  
751 **Mbewe, L. Simubali, C. M. Jones, M. Chaponda, M. Coetzee, M. Mulenga, J.**  
752 **C. Pringle, T. Shields, F. C. Curriero, and D. E. Norris. 2016b.** Spatio-temporal  
753 heterogeneity of malaria vectors in northern Zambia: implications for vector  
754 control. *Parasites & Vectors* 9: 510.
- 755 **Stone, W., B. Grabias, K. Lanke, H. Zheng, E. Locke, D. Diallo, A. Birkett, M. Morin,**  
756 **T. Bousema, and S. Kumar. 2015.** A comparison of *Plasmodium falciparum*  
757 circumsporozoite protein-based slot blot and ELISA immuno-assays for oocyst  
758 detection in mosquito homogenates. *Malaria Journal* 14: 451.
- 759 **Sutcliffe, C. G., T. Kobayashi, H. Hamapumbu, T. Shields, S. Mharakurwa, P. E.**  
760 **Thuma, T. A. Louis, G. Glass, and W. J. Moss. 2012.** Reduced Risk of Malaria  
761 Parasitemia Following Household Screening and Treatment: A Cross-Sectional and  
762 Longitudinal Cohort Study. *PLOS ONE* 7: e31396.

763 **Wat'senga, F., E. Z. Manzambi, A. Lunkula, R. Mulumbu, T. Mampangulu, N. Lobo,**  
764 **A. Hendershot, C. Fornadel, D. Jacob, M. Niang, F. Ntoya, T. Muyembe, J.**  
765 **Likwela, S. R. Irish, and R. M. Oxborough. 2018.** Nationwide insecticide  
766 resistance status and biting behaviour of malaria vector species in the Democratic  
767 Republic of Congo. *Malaria journal* 17: 129-129.

768 **WHO. 2015.** Global technical strategy for malaria 2016–2030. Geneva: World Health  
769 Organization.

770 **WHO. 2019a.** World malaria report 2019. Geneva: World Health Organization.

771 **WHO. 2019b.** High burden to high impact: a targeted malaria response. Geneva: World  
772 Health Organization.

773
